# Supplementary material for: SP140 inhibits STAT1 signaling, induces IFN-γ in tumor-associated macrophages, and is a predictive biomarker of immunotherapy response
Source: PubMed Central journal article supplement — J Immunother Cancer. 2022 Dec 13;10(12):e005088. doi: 10.1136/jitc-2022-005088 (PMC9748993; doi:10.1136/jitc-2022-005088), 2022-12-13
Supplement: jitc-2022-005088supp001.pdf [file jitc-2022-005088supp001.pdf]

**SP140 inhibits STAT1 signaling, induces IFN-gamma in tumor-associated macrophages, and is a predictive biomarker of immunotherapy response**

**Running title:** SP140 and immunotherapy

## Supplementary Materials

**Supplementary table 1-** List of primers used in this study

**Supplementary table 2-** Top GSEA gene sets (hallmark and GO: biological pathways) with FWER < 0.05

**Supplementary Figure 1-** Distributions of SP140 expression levels in TCGA pan cancer are displayed using box plots. The statistical significance computed by the Wilcoxon test is annotated by the number of stars (\*: p-value < 0.05; \*\*: p-value < 0.01; \*\*\*: p-value < 0.001). Normal tissues are depicted in blue and displayed in gray columns when normal data were available in the TCGA dataset.

**Supplementary Figure 2-** Relative delta delta Ct expression value for SP140 gene transcript expression in CAL27, FaDu and THP1-derived naïve macrophages. Results is presented as average of three independent experiment.

**Supplementary Figure 3-** Disease specific survival of patients with high levels of SP140 (n=261) and low levels of SP140 (n=261) in TCGA HNSCC. The p-value was calculated based on the log-rank test.

**Supplementary Figure 4-** Correlation of SP140 expression in HPV positive and HPV negative HNSCC with M1 macrophage (A) and CD8 T cell infiltrations levels (B). P-values are calculated after FDR corrections of Spearman's Rho.

**Supplementary Figure 5-** A, B) SP140 was downregulated using siRNA in naïve (undifferentiated) macrophages and cells were collected for RNA expression analysis by qPCR for IL6 and STAT5a, after 24h. 18s was used as endogenous normalizer. Delta-delta Ct method was used to identify the relative gene expression. Data is presented as mean and SD of fold change compared to the control. \*\* indicates  $p < 0.01$

**Supplementary Figure 6-** SP140 binding to STAT1 promoter sites by ChIP assays. The ChIP assays showed a binding of SP140 to STAT1 promoter sites in THP-1-derived macrophages treated with SP140 siRNA or control siRNA. Data is presented as means  $\pm$  SD.

**Supplementary Figure 7-** A-D) Patients with metastatic melanoma who underwent anti-PD-1 therapy were dichotomized to high expression and low expression group based on median expression of SP140. Tumors with high expression of SP140 (n=13) versus tumors with low levels of SP140 (n=12) showed higher infiltration of M1 macrophages, CD8 T cells, CD4 memory activated T cells, and overall immune score. The Wilcoxon test was used for statistical analysis and p-value was corrected for multiple comparison. \* indicates  $p < 0.05$

**Supplementary Figure 8-** A) The levels of SP140 in thymic carcinoma tumors were significantly higher in anti-PD1 treatment responders versus non-responders (n=9). B) The expression levels of SP140 in recurrent glioblastoma patients who received neoadjuvant anti-PD-1 were significantly higher in treatment responders versus non-responders (n=17). C) Patients

with recurrent glioblastoma were dichotomized to high expression (n=8) and low expression (n=9) groups based on median expression of SP140, deconvolution of immune cells showed higher infiltration of CD8 T-cells and M1 macrophages in the SP140 high group. \* indicates  $p < 0.05$

**Supplementary table 1-** List of primers used in this study

| Gene           | Forward Primer         | Reverse Primer          |
|----------------|------------------------|-------------------------|
| SP140          | CCAGGTGGGGGAGTGTCTGT   | TCTCCCCTGGTGCTGTGCTGT   |
| STAT1          | ACGCCAGAGATTTAATCAGG   | CACTCTTGCCACACCATTG     |
| IL-1RA         | GAATGACGCCCTCAATCAAAGT | TCATCTTGGGCAGTCACATACA  |
| Arginase       | ACAGTTTGGCAATTGGAAGCA  | CACCCAGATGACTCCAAGATCAG |
| IL6            | AGACAGCCACTCACCTCTTCAG | TTCTGCCAGTGCCTCTTTGCTG  |
| STAT5a         | TFACTGAAGATCAAGCTGGGG  | TCATTGTACAGAATGTGCCGG   |
| 18S            | GTAACCCGTTGAACCCATT    | CCATCCAATCGGTAGTAGCG    |
| STAT1 promotor | AGCCCCTTAAGAGTAGGCGA   | CCCCATGCCTTCTCAGTTGT    |

**Supplementary table 2-** Top GSEA gene sets (hallmark and GO: biological pathways) with FWER < 0.05

| <b>HALLMARK</b>                                                                        |      |        |       |           |           |            |
|----------------------------------------------------------------------------------------|------|--------|-------|-----------|-----------|------------|
| <i>Name</i>                                                                            | SIZE | ES     | NES   | NOM p-val | FDR q-val | FWER p-val |
| <i>Positive</i>                                                                        |      |        |       |           |           |            |
| HALLMARK_ALLOGRAFT_REJECTION                                                           | 156  | 0.72   | 2.38  | 0         | 0         | 0          |
| HALLMARK_INTERFERON_GAMMA_RESPONSE                                                     | 169  | 0.64   | 2.10  | 0         | 0         | 0          |
| HALLMARK_INFLAMMATORY_RESPONSE                                                         | 139  | 0.62   | 2.01  | 0         | 0         | 0          |
| HALLMARK_IL6_JAK_STAT3_SIGNALING                                                       | 57   | 0.62   | 1.94  | 0         | 0         | 0          |
| HALLMARK_INTERFERON_ALPHA_RESPONSE                                                     | 88   | 0.60   | 1.92  | 0         | 0         | 0          |
| HALLMARK_COMPLEMENT                                                                    | 123  | 0.55   | 1.79  | 0         | 6.86E-04  | 0.006      |
| HALLMARK_IL2_STAT5_SIGNALING                                                           | 113  | 0.51   | 1.66  | 0         | 0.0049    | 0.05       |
| <i>Negative</i>                                                                        |      |        |       |           |           |            |
| HALLMARK_MYC_TARGETS_V1                                                                | 53   | -0.516 | -3.25 | 0         | 0         | 0          |
| HALLMARK_P53_PATHWAY                                                                   | 99   | -0.29  | -1.97 | 0         | 0.01      | 0.003      |
| HALLMARK_HYPOXIA                                                                       | 82   | -0.28  | -1.96 | 0         | 0.009     | 0.003      |
| HALLMARK_GLYCOLYSIS                                                                    | 83   | -0.31  | -1.80 | 0         | 0.034     | 0.01       |
| HALLMARK_EPITHELIAL_MESENCHYMAL_TRANSITION                                             | 85   | -0.29  | -1.69 | 0         | 0.043     | 0.018      |
| <b>GO: BIOLOGICAL PATHWAY</b>                                                          |      |        |       |           |           |            |
| <i>Positive</i>                                                                        |      |        |       |           |           |            |
| GOBP_IMMUNE_RESPONSE_REGULATING_CELL_SURFACE_RECEPTOR_SIGNALING_PATHWAY                | 178  | 0.72   | 2.39  | 0         | 0         | 0          |
| GOBP_ADAPTIVE_IMMUNE_RESPONSE                                                          | 299  | 0.71   | 2.39  | 0         | 0         | 0          |
| GOBP_ADAPTIVE_IMMUNE_RESPONSE                                                          | 299  | 0.71   | 2.39  | 0         | 0         | 0          |
| GOBP_LYMPHOCYTE_ACTIVATION                                                             | 417  | 0.69   | 2.35  | 0         | 0         | 0          |
| GOBP_POSITIVE_T_CELL_SELECTION                                                         | 25   | 0.83   | 2.35  | 0         | 0         | 0          |
| GOBP_LYMPHOCYTE_ACTIVATION_INVOLVED_IN_IMMUNE_RESPONSE                                 | 113  | 0.73   | 2.35  | 0         | 0         | 0          |
| GOBP_REGULATION_OF_LYMPHOCYTE_ACTIVATION                                               | 271  | 0.70   | 2.34  | 0         | 0         | 0          |
| GOBP_NEGATIVE_REGULATION_OF_LEUKOCYTE_CELL_CELL_ADHESION                               | 73   | 0.73   | 2.34  | 0         | 0         | 0          |
| GOBP_B_CELL_MEDIATED_IMMUNITY                                                          | 97   | 0.71   | 2.33  | 0         | 0         | 0          |
| GOBP_ANTIGEN_RECEPTOR_MEDIATED_SIGNALING_PATHWAY                                       | 120  | 0.72   | 2.33  | 0         | 0         | 0          |
| GOBP_DENDRITIC_CELL_MIGRATION                                                          | 22   | 0.84   | 2.33  | 0         | 0         | 0          |
| GOBP_T_CELL_ACTIVATION                                                                 | 297  | 0.70   | 2.33  | 0         | 0         | 0          |
| GOBP_REGULATION_OF_LEUKOCYTE_PROLIFERATION                                             | 164  | 0.70   | 2.32  | 0         | 0         | 0          |
| GOBP_LYMPHOCYTE_MEDIATED_IMMUNITY                                                      | 195  | 0.70   | 2.31  | 0         | 0         | 0          |
| GOBP_REGULATION_OF_T_CELL_ACTIVATION                                                   | 206  | 0.70   | 2.31  | 0         | 0         | 0          |
| GOBP_ANTIGEN_PROCESSING_AND_PRESENTATION_OF_EXOGENOUS_PEPTIDE_ANTIGEN_VIA_MHC_CLASS_II | 0.83 | 2.31   | 0     | 0         | 0         | 0          |
| <i>Negative</i>                                                                        |      |        |       |           |           |            |
| GOBP KERATINIZATION                                                                    | 27   | -0.91  | -4.17 | 0         | 0         | 0          |
| GOBP_SKIN_DEVELOPMENT                                                                  | 108  | -0.54  | -4.11 | 0         | 0         | 0          |
| GOBP KERATINOCYTE DIFFERENTIATION                                                      | 58   | -0.68  | -3.87 | 0         | 0         | 0          |
| GOBP EPIDERMAL_CELL_DIFFERENTIATION                                                    | 78   | -0.56  | -3.73 | 0         | 0         | 0          |
| GOBP_RIBOSOMAL_LARGE_SUBUNIT_BIOGENESIS                                                | 30   | -0.62  | -2.85 | 0         | 0         | 0          |
| GOBP KERATINOCYTE_PROLIFERATION                                                        | 21   | -0.62  | -2.69 | 0         | 0         | 0          |
| GOBP_INTERMEDIATE_FILAMENT_BASED_PROCES                                                | 31   | -0.51  | -2.52 | 0         | 2.11E-    | 0.002      |

|                              |    |       |       |   |          |       |
|------------------------------|----|-------|-------|---|----------|-------|
| S                            |    |       |       |   | 04       |       |
| GOBP_RIBOSOME_ASSEMBLY       | 22 | -0.57 | -2.50 | 0 | 2.03E-04 | 0.002 |
| GOBP_MOLTING_CYCLE           | 44 | -0.46 | -2.47 | 0 | 2.92E-04 | 0.003 |
| GOBP_CYTOPLASMIC_TRANSLATION | 39 | -0.45 | -2.40 | 0 | 7.08E-04 | 0.007 |

*ES: enrichment score; NES: normalized enrichment score; NOM-p-val: nominal p-value; FDR q-val: false discovery rate corrected p-value; FWER p-val: Familywise-error rate p-value*

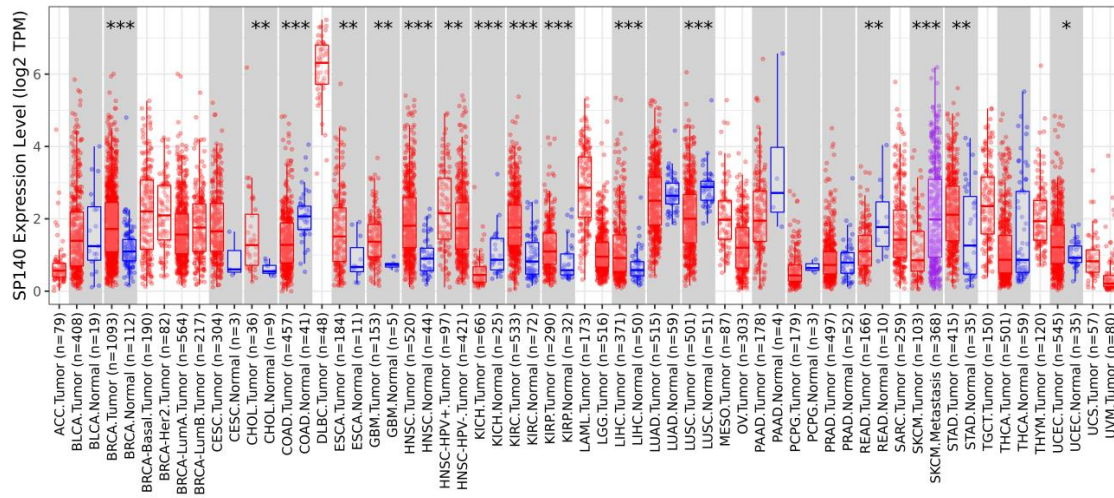

**Supplementary Figure 1-** Distributions of SP140 expression levels in TCGA pan cancer are displayed using box plots. The statistical significance computed by the Wilcoxon test is annotated by the number of stars (\*: p-value < 0.05; \*\*: p-value < 0.01; \*\*\*: p-value < 0.001). Normal tissues are depicted in blue and displayed in gray columns when normal data were available in the TCGA dataset.

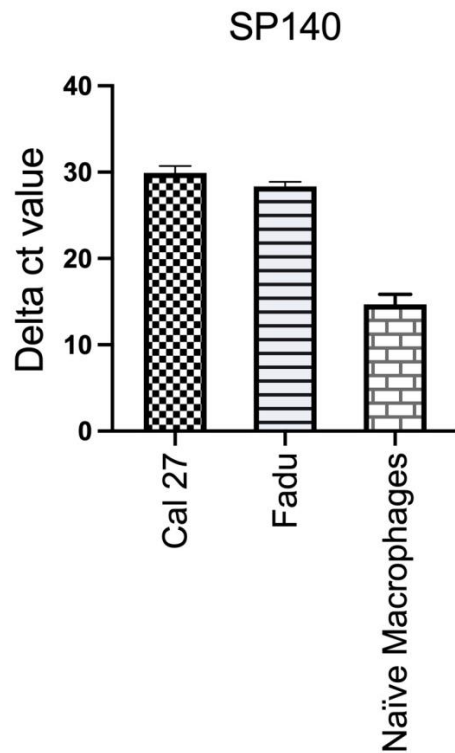

**Supplementary Figure 2-** Relative delta delta Ct expression value for SP140 gene transcript expression in CAL27, FaDu and THP1-derived naïve macrophages. Results are presented as average of three independent experiments.



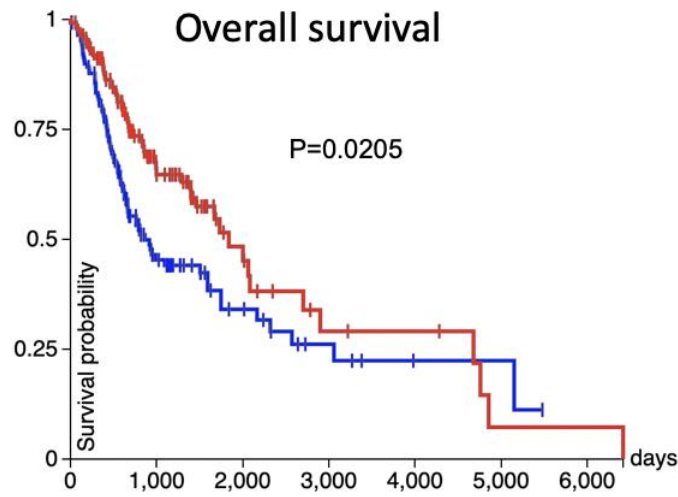

**Supplementary Figure 3-** Disease specific survival of patients with high levels of SP140 (n=261) and low levels of SP140 (n=261) in TCGA HNSCC. The p-value was calculated based on the log-rank test.

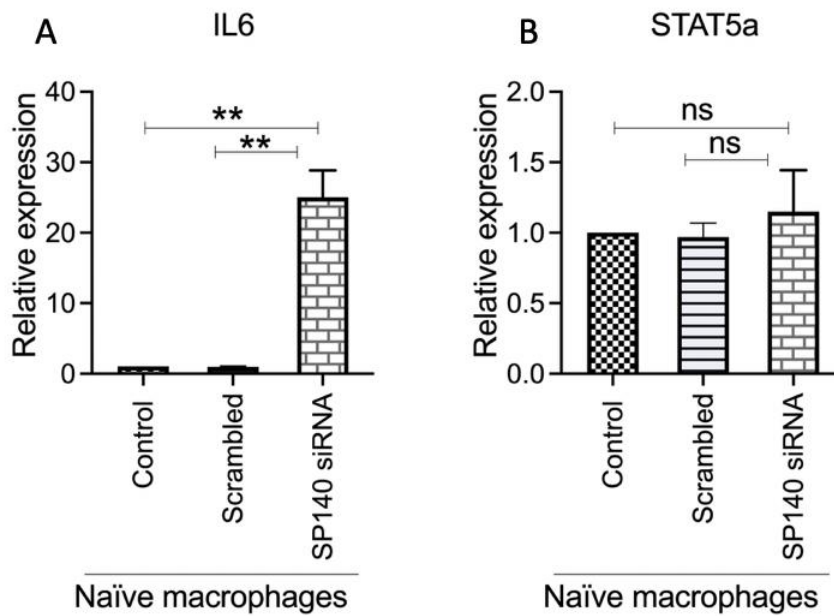

**Supplementary Figure 5-** A, B) SP140 was downregulated using siRNA in naïve (undifferentiated) macrophages and cells were collected for RNA expression analysis by qPCR for IL6 and STAT5a, after 24h. 18s was used as endogenous normalizer. Delta-delta Ct method was used to identify the relative gene expression. Data is presented as mean and SD of fold change compared to the control. \*\* indicates  $p < 0.01$

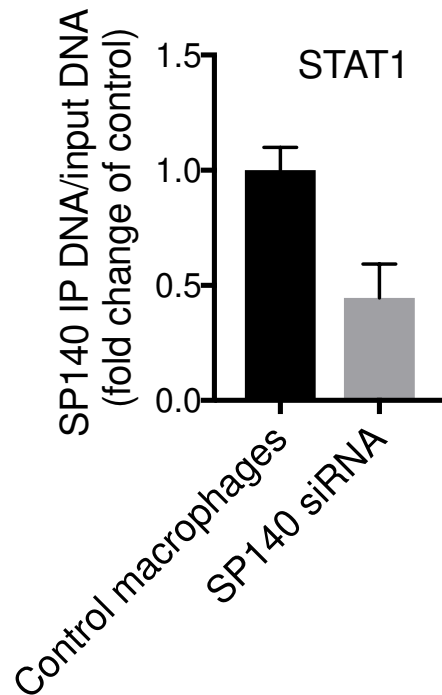

**Supplementary Figure 6-** SP140 binding to STAT1 promoter sites by ChIP assays. The ChIP assays showed a binding of SP140 to STAT1 promoter sites in THP-1-derived macrophages treated with SP140 siRNA or control siRNA. Data is presented as means  $\pm$  SD.

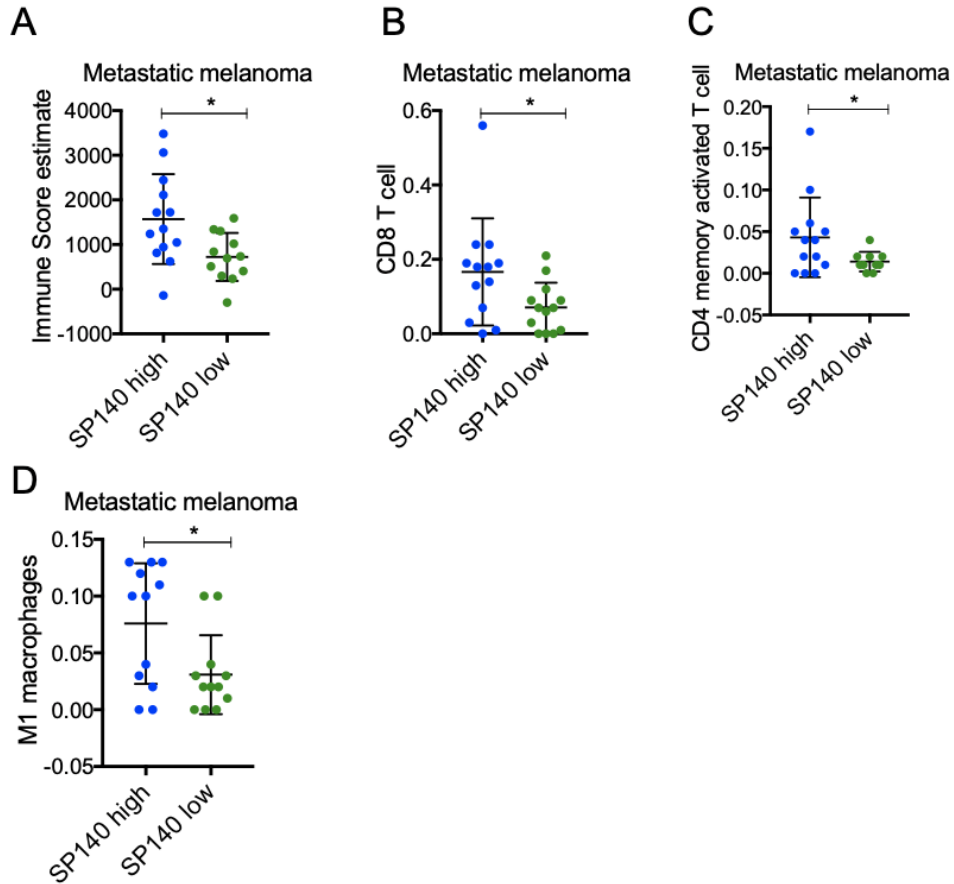

**Supplementary Figure 7-** A-D) Patients with metastatic melanoma who underwent anti-PD-1 therapy were dichotomized to high expression and low expression group based on median expression of SP140. Tumors with high expression of SP140 (n=13) versus tumors with low levels of SP140 (n=12) showed higher infiltration of M1 macrophages, CD8 T cells, CD4 memory activated T cells, and overall immune score. The Wilcoxon test was used for statistical analysis and p-value was corrected for multiple comparison. \* indicates  $p < 0.05$

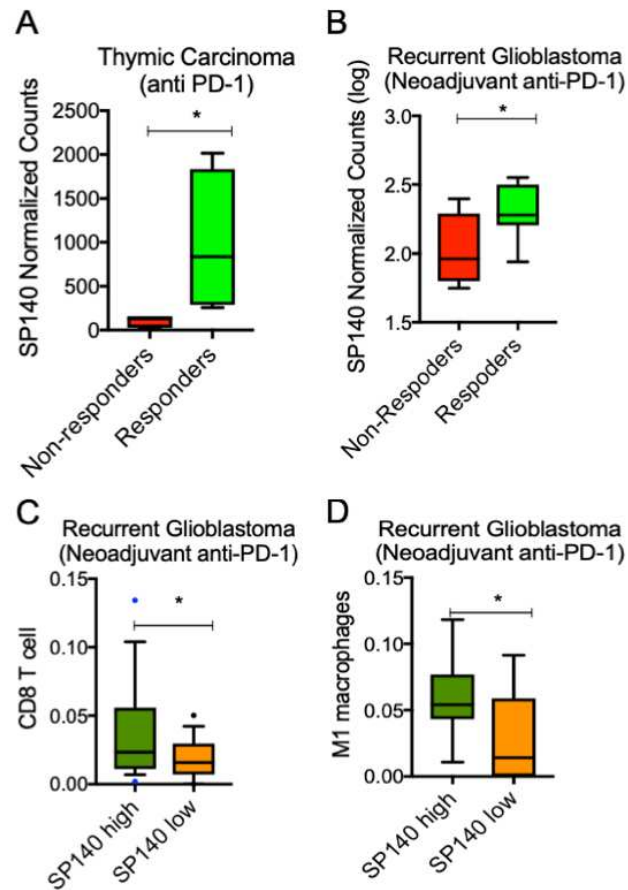

**Supplementary Figure 8-** A) The levels of SP140 in thymic carcinoma tumors were significantly higher in anti-PD1 treatment responders versus non-responders (n=9). B) The expression levels of SP140 in recurrent glioblastoma patients who received neoadjuvant anti-PD-1 were significantly higher in treatment responders versus non-responders (n=17). C) Patients with recurrent glioblastoma were dichotomized to high expression (n=8) and low expression (n=9) groups based on median expression of SP140, deconvolution of immune cells showed higher infiltration of CD8 T cells and M1 macrophages in the SP140 high group. \* indicates  $p < 0.05$
